# Supplementary material for: Safety of AAV Factor IX Peripheral Transvenular Gene Delivery to Muscle in Hemophilia B Dogs
Source: PubMed Central journal article supplement — Mol Ther. 2010 Apr 27;18(7):1318–29. doi: 10.1038/mt.2010.73 (PMC2911254; doi:10.1038/mt.2010.73), 2010-04-27
Supplement: mt201073x1.pdf [file mt201073x1.pdf]

**SUPPLEMENTARY MATERIAL: Table S1. Summary of IFN- $\gamma$  responses monitored by antigen-specific ELISpot**

| Experimental group and vector dose                          | Dog ID | IFN- $\gamma$ response to the AAV capsid |          |          |          | IFN- $\gamma$ response to cFIX |
|-------------------------------------------------------------|--------|------------------------------------------|----------|----------|----------|--------------------------------|
|                                                             |        | 2 Weeks                                  | 4 Weeks  | 8 Weeks  | 12 Weeks | Multiple time points           |
| <b>A - Low dose IS:</b><br>1 x 10 <sup>12</sup> vg/kg       | I04    | -                                        | -        | Negative | -        | Negative                       |
|                                                             | I05    | -                                        | -        | Negative | -        | Negative                       |
|                                                             | J04    | -                                        | -        | Negative | -        | Negative                       |
| <b>B - Mid dose IS:</b><br>3 x 10 <sup>12</sup> vg/kg       | I07    | -                                        | -        | Negative | -        | Negative                       |
|                                                             | H34    | Negative                                 | -        | Negative | Negative | Negative                       |
|                                                             | H48    | -                                        | -        | Negative | -        | Negative                       |
| <b>C - High dose IS:</b><br>8.5 x 10 <sup>12</sup> vg/kg    | H24    | -                                        | -        | Negative | -        | Negative                       |
|                                                             | M25    | -                                        | -        | Negative | -        | Negative                       |
| <b>D - Mid dose no IS:</b><br>3 x 10 <sup>12</sup> vg/kg    | J03    | Negative                                 | Negative | Negative | -        | Negative                       |
|                                                             | J62    | Negative                                 | -        | Negative | Negative | Negative                       |
| <b>E - Mid dose IM no IS:</b><br>3 x 10 <sup>12</sup> vg/kg | M14    | -                                        | Negative | Negative | -        | Negative                       |
|                                                             | M24    | Negative                                 | Negative | Negative | -        | Negative                       |
| <b>F - Mid dose AAV-6 IS:</b><br>3 x 10 <sup>12</sup> vg/kg | M13    | -                                        | -        | Negative | Negative | Negative                       |
|                                                             | M20    | -                                        | -        | Negative | Negative | Negative                       |
| <b>AAV-1-null IM no IS:</b><br>2 x 10 <sup>12</sup> vg/kg   | J53    | Negative                                 | Negative | Negative | Negative | n/a                            |
